# Supplementary material for: A Genome-Wide Survey of Imprinted Genes in Rice Seeds Reveals Imprinting Primarily Occurs in the Endosperm
Source: PLoS Genet. 2011 Jun 23;7(6):e1002125. doi: 10.1371/journal.pgen.1002125 (PMC3121744; doi:10.1371/journal.pgen.1002125)
Supplement: Table S3 — Biased genic and non-genic regions imprinted in endosperm and embryos - full description. (XLS) [file pgen.1002125.s010.xls]

## Sheet: Sheet1
Table S3. Biased genic and non-genic regions imprinted in endosperm and embryos - full description
(A) Biased genic regions (cDNAs) in embryo																	Expression in Endosperm (En)
Chr	Start	End	Bias Type	Tissue	Transcript	Number of additional isoforms supported	Feature	Annotation	Total Reads	SNPs	Total SNP Reads	Mat Reads/Million	Pat Reads/Million	Bias	LogP		Total Reads (En)	Total SNP Reads (En)	Mat Reads/Million (En)	Pat Reads/Million (En)	Bias Type (En)
Chr2	3441717	3451212	Maternal	Embryo	LOC_Os02g06830.1		cDNA	expressed protein	2174	56	1098	5.9	4.08	0.21	1.57706		93	43	0.607143	0.160714	Reads below threshold
Chr5	3335223	3339792	Maternal	Embryo	LOC_Os05g06480.1		cDNA	inorganic H+ pyrophosphatase, putative, expressed	228	16	58	0.48	0.1	0.42	2.11616		89978	24405	314.804	185	No bias
Chr8	5207388	5208572	Maternal	Embryo	LOC_Os08g08960.1		cDNA	Cupin domain containing protein, expressed	403	5	75	0.75	0	1.00	5.22453		630	40	0.3295	0.02685	Maternal
Chr3	3892405	3892043	Maternal (?)	Embryo	LOC_Os03g07660.1		cDNA	hypothetical protein	1158	3	15	0.14	0.01	1.001	1.601		0	0	0	0	Reads below threshold
Chr6	13726079	13722825	Maternal (?)	Embryo	LOC_Os06g23530.1		cDNA	ATP-dependent RNA helicase, putative, expressed	3005	19	25	0.21	0.04	1.001	1.341		958	180	2	0.892857	Reads below threshold
Chr8	2014566	2012948	Maternal (?)	Embryo	LOC_Os08g04150.1		cDNA	expressed protein	1519	12	17	0.15	0.02	1.001	1.601		894	244	2.75	1.60714	Reads below threshold
Chr10	2896593	2898171	Maternal (?)	Embryo	LOC_Os10g05750.1		cDNA	POEI3 - Pollen Ole e I allergen and extensin family protein precursor, expressed	195	8	28	0.28	0	1.001	3.041		880	162	2.89286	0	Maternal
														1 data for one cross only, 2nd cross has reads below threshold
(B) Biased genic regions (cDNAs) in endosperm																	Expression in Embryo (Em)					Expression in Sperm
Chr	Start	End	Bias Type	Tissue	Transcript	Number of additional isoforms supported	Feature	Annotation	Total Reads	SNPs	Total SNP Reads	Mat Reads/Million	Pat Reads/Million	Bias	LogP		Total Reads (Em)	Total SNP Reads (Em)	Mat Reads/Million (Em)	Pat Reads/Million (Em)	Bias Type (Em)	Probe ID	Sperm
Chr1	3713109	3717262	Paternal	Endosperm	LOC_Os01g07740.1	2	cDNA	DEAD-box ATP-dependent RNA helicase 14, putative, expressed	4801	7	224	0.589286	3.41071	0.966667	25.4762		22684	919	4.56	4.63	Subspecies bias	Os.7205.1.A1_at	PPP
Chr1	3834129	3837211	Maternal	Endosperm	LOC_Os01g07940.1		cDNA	AGC_PVPK_like_kin82y.3 - ACG kinases include homologs to PKA, PKG and PKC, expressed	270	20	57	0.4246	0.07935	0.758333	1.75394		1119	501	2.64	2.37	Subspecies bias	Os.33127.2.S1_x_at	PPP
Chr1	5257256	5260017	Maternal	Endosperm	LOC_Os01g10080.2		cDNA	expressed protein	4092	4	830	14.7679	0.0535714	0.989565	21.4667		4384	1064	6.02	4.62	No bias	Os.2196.1.S1_a_at	PPP
Chr1	5577753	5584267	Maternal	Endosperm	LOC_Os01g10520.1		cDNA	expressed protein	676	13	189	3.375	0	1	5.07316		149	20	0.13	0.07	Reads below threshold	OsAffx.22137.1.S1_x_at	AAA
Chr1	7114771	7123102	Maternal	Endosperm	LOC_Os01g12860.1		cDNA	MYB family transcription factor, putative, expressed	2634	4	67	0.5041	0.08845	0.71167	1.45649		11270	864	4.52	4.12	No bias	Os.22373.1.S1_at	PPP
Chr1	7156780	7163385	Maternal	Endosperm	LOC_Os01g12890.1		cDNA	expressed protein	2148	15	310	5.28571	0.25	0.958042	5.53617		1939	289	1.52	1.37	No bias	Os.3560.1.S1_a_at	PPP
Chr1	7344590	7345978	Maternal	Endosperm	LOC_Os01g13180.1		cDNA	expressed protein	2238	3	193	3.44643	0	1	5.6021		60	5	0.04	0.01	Reads below threshold	****no probe set to this locus available ****
Chr1	10627367	10629517	Maternal	Endosperm	LOC_Os01g18810.1		cDNA	hypothetical protein	1202	2	34	0.2933	0.00895	0.947368	2.08879		2	0	0	0	Reads below threshold	OsAffx.23298.1.S1_at	AAP
Chr1	21712681	21713915	Maternal	Endosperm	LOC_Os01g38650.1		cDNA	expressed protein	1120	13	548	9.76786	0.0178571	1	17.0347		9	3	0.03	0	Reads below threshold	Os.23623.1.A1_at	PPP
Chr1	22834734	22839083	Maternal	Endosperm	LOC_Os01g40450.1		cDNA	2-aminoethanethiol dioxygenase, putative, expressed	2781	7	433	7.71429	0.0178571	1	11.4822		1	1	0.01	0	Reads below threshold	OsAffx.23607.1.S1_x_at	AAA
Chr1	23951756	23962411	Maternal	Endosperm	LOC_Os01g42270.1		cDNA	transcriptional corepressor LEUNIG, putative	1587	9	215	3.83929	0	1	5.52668		2	0	0	0	Reads below threshold	OsAffx.11436.1.S1_x_at	AAP
Chr1	31510490	31518551	Paternal	Endosperm	LOC_Os01g54784.1		cDNA	expressed protein	1582	5	165	0.0357143	2.91071	1	26.643		3665	290	1.58	1.32	No bias	Os.26431.1.A1_a_at	PPP
Chr1	32302655	32305593	Paternal	Endosperm	LOC_Os01g56110.1		cDNA	RNA recognition motif containing protein, putative	410	7	82	0.0178571	1.44643	1	14.9181		8	3	0.01	0.02	Reads below threshold	OsAffx.23804.1.S1_at	AAA
Chr1	35708455	35712619	Maternal	Endosperm	LOC_Os01g61720.3	3	cDNA	IQ calmodulin-binding motif domain containing protein, expressed	1763	3	56	0.4432	0.0531	0.815341	2.17681		13888	412	1.92	2.2	No bias	Os.12979.2.S1_at	PAA
Chr1	36655297	36659725	Paternal	Endosperm	LOC_Os01g63250.1		cDNA	josephin, putative, expressed	2076	4	235	0.0535714	4.14286	0.988722	38.8638		3764	603	3.23	2.8	No bias	Os.7799.1.S1_at	PPP
Chr1	37068351	37070869	Maternal	Endosperm	LOC_Os01g63890.1		cDNA	G10 protein, putative, expressed	668	3	47	0.356	0.0621	0.722222	1.34199		2923	746	3.92	3.54	Subspecies bias	Os.3537.1.S1_at	PPP
Chr1	37615661	37621052	Maternal	Endosperm	LOC_Os01g64810.2		cDNA	zinc finger DHHC domain-containing protein, putative, expressed	3211	10	514	7.98214	1.19643	0.75431	5.56456		4732	865	4.66	3.99	No bias	Os.8978.1.S1_a_at	PPP
Chr1	38227769	38236185	Paternal	Endosperm	LOC_Os01g65850.1		cDNA	CHD3-type chromatin-remodeling factor PICKLE, putative	1649	15	199	0.339286	3.21429	0.964286	31.7798		31	4	0.02	0.02	Reads below threshold	OsAffx.23930.1.S1_at	PPP
Chr1	39984180	39985455	Paternal	Endosperm	LOC_Os01g68820.1		cDNA	expressed protein	11966	4	1372	0.125	24.375	0.994681	228.62		37	0	0	0	Reads below threshold	Os.31501.1.S1_s_at	AAP
Chr1	40114864	40120071	Paternal	Endosperm	LOC_Os01g69040.1	1	cDNA	zinc finger, C3HC4 type domain containing protein, expressed	487	5	57	0.0535714	0.964286	0.944444	7.9014		3899	448	2.42	2.06	No bias	Os.27953.1.S1_x_at	PPP
Chr1	40539921	40553708	Paternal	Endosperm	LOC_Os01g70060.1	1	cDNA	protein of unknown function, DUF618 domain containing protein, expressed	1665	16	213	1.26786	2.53571	0.66087	15.5592		6205	963	4.89	4.74	No bias	Os.7001.1.S1_at	PAA
Chr2	6774043	6778174	Paternal	Endosperm	LOC_Os02g12840.1		cDNA	DEAD-box ATP-dependent RNA helicase, putative, expressed	565	22	116	0.535714	1.53571	0.788732	13.7784		440	43	0.25	0.18	No bias	OsAffx.24217.1.S1_at	PPP
Chr2	9848197	9852415	Paternal	Endosperm	LOC_Os02g17190.1		cDNA	MYB family transcription factor, putative, expressed	430	2	29	0	0.517857	1	6.01621		5997	183	0.96	0.87	No bias	Os.48621.1.S1_at	PPP
Chr2	12720879	12729010	Paternal	Endosperm	LOC_Os02g21430.1		cDNA	AML1, putative, expressed	2248	8	157	0.0178571	2.78571	1	38.8588		5943	418	1.89	2.29	No bias	Os.19622.1.S1_at	PPP
Chr2	16909659	16913426	Maternal	Endosperm	LOC_Os02g28580.1		cDNA	expressed protein	6119	7	620	10.1964	0.875	0.992288	14.8692		13	1	0.01	0	Reads below threshold	Os.18336.1.S1_at	AAP
Chr2	16953627	16955752	Maternal	Endosperm	LOC_Os02g28660.1		cDNA	hypothetical protein	874	5	101	1.76786	0.0357143	1	2.68725		3	0	0	0	Reads below threshold	OsAffx.2779.1.S1_at	AAA
Chr2	17252070	17260196	Paternal	Endosperm	LOC_Os02g29140.1		cDNA	ankyrin, putative, expressed	2421	8	313	0.321429	5.26786	1	50.7885		1955	333	1.7	1.63	No bias	OsAffx.2784.1.S1_s_at	PPP
Chr2	17265313	17269995	Paternal	Endosperm	LOC_Os02g29150.2		cDNA	OsFBO11 - F-box and other domain containing protein, expressed	364	13	92	0.339286	1.30357	0.85	11.4073		10250	2373	11.59	12.14	Subspecies bias	Os.8269.1.A1_at	PPP
Chr2	17348970	17357069	Maternal	Endosperm	LOC_Os02g29230.1		cDNA	conserved hypothetical protein	939	26	158	2.82143	0	1	4.23653		7	0	0	0	Reads below threshold	OsAffx.2788.1.S1_at	AAA
Chr2	18114340	18115649	Maternal	Endosperm	LOC_Os02g30420.1		cDNA	expressed protein	1657	3	44	0.3469	0.0446	0.851852	2.01226		2097	149	0.82	0.67	No bias	****no probe set to this locus available ****
Chr2	18633267	18636019	Maternal	Endosperm	LOC_Os02g31140.1		cDNA	major ampullate spidroin 2-2, putative, expressed	4054	5	571	9.73214	0.464286	0.914062	12.5813		3191	576	2.92	2.84	No bias	OsAffx.12306.1.S1_at	AAA
Chr2	18891680	18896222	Maternal	Endosperm	LOC_Os02g31970.1		cDNA	retrotransposon protein, putative, unclassified	327	10	38	0.3195	0.0179	0.9	1.94264		2	0	0	0	Reads below threshold	****no probe set to this locus available ****
Chr2	21098766	21102188	Paternal	Endosperm	LOC_Os02g35144.1		cDNA	zinc finger, C3HC4 type domain containing protein, expressed	511	4	37	0.0357143	0.625	0.925	5.74906		6391	514	2.84	2.3	No bias	Os.23148.1.A1_at	PPP
Chr2	22032735	22036152	Maternal	Endosperm	LOC_Os02g36490.1	2	cDNA	expressed protein	338	14	62	0.46935	0.07965	0.732057	1.79966		3788	1198	5.84	6.14	Subspecies bias	Os.21243.1.S1_at	AAP
Chr2	23126159	23134470	Maternal	Endosperm	LOC_Os02g38250.1		cDNA	EMB1745, putative, expressed	906	3	35	0.26645	0.0443	0.757353	1.46987		7150	419	2.24	1.95	No bias	Os.6276.1.S1_at	PPP
Chr2	24133884	24140836	Paternal	Endosperm	LOC_Os02g39920.1		cDNA	AT hook motif family protein, expressed	8106	8	677	0.160714	11.9286	0.988189	109.167		42543	5168	27.76	23.92	No bias	Os.17981.1.S1_at	PPP
Chr2	26164518	26169101	Maternal	Endosperm	LOC_Os02g43370.1		cDNA	transposon protein, putative, unclassified, expressed	952	5	28	0.2491	0	1	1.59607		3333	125	0.49	0.76	No bias	OsAffx.2947.1.S1_at	APP
Chr2	26227039	26232421	Maternal	Endosperm	LOC_Os02g43460.1		cDNA	required to maintain repression 1, putative	2569	10	82	0.6371	0.08905	0.726667	1.41042		12	1	0.01	0	Reads below threshold	OsAffx.12476.1.S1_at	AAA
Chr2	31558927	31566094	Paternal	Endosperm	LOC_Os02g51540.1		cDNA	eukaryotic aspartyl protease domain containing protein, expressed	2779	7	268	0.0535714	4.73214	0.988095	40.3332		15559	1633	8.58	7.75	No bias	Os.6133.1.S1_at	PPP
Chr2	31757146	31762913	Paternal	Endosperm	LOC_Os02g51860.1		cDNA	dehydration response related protein, putative, expressed	1183	4	77	0.0357143	1.33929	1	12.3147		7635	288	1.41	1.47	No bias	Os.24364.1.A1_s_at	PPP
Chr2	32378977	32389220	Paternal	Endosperm	LOC_Os02g52960.1		cDNA	PHD-finger domain containing protein, putative, expressed	10335	22	1154	2.16071	18.4464	0.922739	197.806		16745	1604	8.81	7.23	No bias	OsAffx.3051.1.S1_at	PPP
Chr2	33154777	33162123	Paternal	Endosperm	LOC_Os02g54120.1	3	cDNA	CCR4-NOT transcription factor, putative, expressed	2782	10	247	2.23214	2.17857	0.255814	3.10032		5141	712	3.78	3.34	No bias	Os.14664.1.A1_at	PPP
Chr2	33380570	33387027	Maternal	Endosperm	LOC_Os02g54510.1	2	cDNA	protein kinase domain containing protein, expressed	1331	6	45	0.33675	0.06175	0.752315	1.68402		12165	758	4.05	3.53	No bias	Os.22443.1.S1_at	PPP
Chr2	34020404	34024433	Maternal	Endosperm	LOC_Os02g55560.1	1	cDNA	protein phosphatase 2C, putative, expressed	20648	4	574	10.1071	0.142857	0.982353	14.1366		1458	71	0.42	0.29	No bias	Os.13743.1.S1_at	AMP
Chr2	34939104	34946140	Paternal	Endosperm	LOC_Os02g57080.1	1	cDNA	serine/threonine-protein kinase, putative, expressed	1240	5	117	0.0178571	2.07143	1	22.5332		11593	1059	5.49	5.1	No bias	Os.52783.1.A1_x_at	PPP
Chr2	35022700	35034601	Paternal	Endosperm	LOC_Os02g57190.1		cDNA	Myosin head domain containing protein, expressed	1519	5	118	0.0535714	2.05357	0.973684	16.7112		9723	530	2.81	2.49	No bias	Os.4855.1.S1_at	PPP
Chr3	218977	220070	Maternal	Endosperm	LOC_Os03g01320.1	1	cDNA	LTPL116 - Protease inhibitor/seed storage/LTP family protein precursor, expressed	164	2	30	0.26725	0	1	1.46987		30215	4062	22.82	17.8	Subspecies bias	Os.37616.1.S1_at	AAA
Chr3	1076382	1078380	Maternal	Endosperm	LOC_Os03g02770.1		cDNA	expressed protein	307	6	28	0.23035	0.0176	0.9375	1.59607		982	128	0.73	0.55	No bias	Os.6004.2.S1_at	AAP
Chr3	3985725	3988995	Maternal	Endosperm	LOC_Os03g07840.1		cDNA	adenylosuccinate synthetase, chloroplast precursor, putative, expressed	14388	2	58	0.43505	0.07965	0.717949	2.00774		22588	1394	7.25	6.69	No bias	Os.8295.1.S1_at	AAA
Chr3	5982707	5987454	Paternal	Endosperm	LOC_Os03g11550.1	1	cDNA	protein of unknown function DUF1675 domain containing protein, expressed	982	5	143	0.875	1.67857	0.5	7.58833		40975	5004	25.91	24.13	No bias	Os.4900.1.S1_at	APA
Chr3	11198650	11203731	Paternal	Endosperm	LOC_Os03g19920.1		cDNA	expressed protein	1028	5	85	0.142857	1.375	0.975	17.5582		1258	84	0.44	0.4	No bias	OsAffx.12948.1.S1_at	AAA
Chr3	11558880	11561282	Maternal	Endosperm	LOC_Os03g20430.1		cDNA	histone-lysine N-methyltransferase, H3 lysine-9 specific SUVH8, putative, expressed	143	8	37	0.32835	0	1	2.56867		1079	0	0	0	Reads below threshold	Os.53895.1.S1_at	PPP
Chr3	13235401	13246616	Maternal	Endosperm	LOC_Os03g22900.1		cDNA	SNF2 family N-terminal domain containing protein, expressed	4082	5	158	1.2991	0.09835	0.777778	2.07531		15747	1268	6.47	6.21	No bias	Os.48420.1.A1_at	PPP
Chr3	15745919	15751025	Paternal	Endosperm	LOC_Os03g27450.1	1	cDNA	ADP-ribosylation factor, putative, expressed	3189	4	494	0.0178571	8.80357	1	76.3591		5717	797	4.13	3.84	Subspecies bias	Os.14128.1.S1_at	PPP
Chr3	15749984	15754753	Paternal	Endosperm	LOC_Os03g27460.1	2	cDNA	heat shock protein DnaJ, putative, expressed	5108	8	769	0.892857	12.8393	0.9125	117.18		17128	2826	15.38	12.88	No bias	Os.12818.1.S1_at	PPP
Chr3	21645910	21658739	Paternal	Endosperm	LOC_Os03g38970.1		cDNA	metal ion binding protein, putative, expressed	5352	6	109	0.0178571	1.92857	1	21.0712		3979	122	0.68	0.54	No bias	Os.15050.1.S1_at	PPP
Chr3	32037081	32041126	Paternal	Endosperm	LOC_Os03g56250.1		cDNA	LRR receptor-like protein kinase, putative, expressed	1912	11	138	0.607143	1.85714	0.928571	16.7615		5120	589	3.37	2.52	No bias	Os.21066.1.S1_at	AAP
Chr4	4646908	4648169	Maternal	Endosperm	LOC_Os04g08570.1		cDNA	uncharacterized PE-PGRS family protein PE_PGRS20, putative, expressed	1487	18	675	12	0.0535714	0.992462	15.1998		4	0	0	0	Reads below threshold	Os.56049.1.S1_at	AAA
Chr4	11641100	11650855	Paternal	Endosperm	LOC_Os04g20774.1		cDNA	pumilio-family RNA binding repeat containing protein, expressed	2549	8	211	0.142857	3.625	0.987805	35.9517		10	0	0	0	Reads below threshold	Os.53576.1.S1_at	PPP
Chr4	12588529	12593125	Paternal	Endosperm	LOC_Os04g22240.1		cDNA	zinc finger, C3HC4 type domain containing protein	678	7	71	0	1.26786	1	11.6656		217	53	0.36	0.17	Subspecies bias	OsAffx.3855.1.S1_at	APA
Chr4	16430514	16433180	Maternal	Endosperm	LOC_Os04g28120.1		cDNA	response regulator receiver domain containing protein, expressed	3298	10	914	15.375	0.946429	0.877147	22.1746		8	3	0.03	0	Reads below threshold	OsAffx.14012.1.S1_at	AAA
Chr4	19679520	19686702	Paternal	Endosperm	LOC_Os04g32880.1	4	cDNA	CBS domain containing membrane protein, putative, expressed	3727	6	212	1.16071	2.625	0.789062	12.5056		8024	715	3.84	3.31	No bias	Os.48035.1.S1_at	PPP
Chr4	20067836	20071368	Paternal	Endosperm	LOC_Os04g33460.1		cDNA	1,4-alpha-glucan-branching enzyme 2, chloroplast precursor, putative, expressed	8681	2	502	4.32143	4.64286	0.468447	14.0833		12686	1668	9.36	7.32	Subspecies bias	****no probe set to this locus available ****
Chr4	23093325	23094352	Maternal	Endosperm	LOC_Os04g39150.1		cDNA	pathogenesis-related Bet v I family protein, putative, expressed	2318	1	143	1.2532	0.0088	1	3.04042		992	81	0.37	0.44	No bias	Os.12387.1.S1_at	PAA
Chr4	23368560	23375494	Maternal	Endosperm	LOC_Os04g39560.1	2	cDNA	expressed protein	11777	11	863	14.5536	0.857143	0.864662	15.41		11473	768	4.05	3.63	No bias	Os.12231.1.S1_a_at	PPP
Chr4	23682315	23687167	Maternal	Endosperm	LOC_Os04g40090.1		cDNA	zinc finger, ZZ type family protein, expressed	5777	8	48	0.37365	0.0534	0.803245	1.99579		13435	4102	21.73	19.29	No bias	Os.49749.1.S1_at	PPP
Chr4	24808692	24814461	Paternal	Endosperm	LOC_Os04g42250.2	1	cDNA	transferase family protein, putative, expressed	3045	3	248	0.0714286	4.35714	0.990132	44.3935		30268	2252	12	10.52	No bias	Os.12225.1.S1_at	AAA
Chr4	27241604	27244738	Maternal	Endosperm	LOC_Os04g46290.1		cDNA	ethylene-responsive element-binding protein, putative, expressed	427	3	26	0.21275	0.0176	0.928571	1.59607		2775	351	1.9	1.61	No bias	Os.9806.1.S1_at	PPP
Chr4	33126220	33127894	Paternal	Endosperm	LOC_Os04g55930.1		cDNA	expressed protein	44652	2	400	1.6755	1.88155	0.145833	1.87522		13960	2335	12.53	10.82	Subspecies bias	Os.8192.1.S1_at	PPA
Chr5	2874301	2884757	Paternal	Endosperm	LOC_Os05g05780.1		cDNA	chromatin-remodeling complex ATPase chain, putative, expressed	12068	8	796	3.25	10.9643	0.90843	83.5812		10156	685	3.36	3.49	No bias	Os.2916.1.S1_at	PPP
Chr5	2884856	2889451	Paternal	Endosperm	LOC_Os05g05790.1		cDNA	double-stranded RNA binding motif containing protein, expressed	228	4	21	0	0.375	1	3.89179		2608	197	1.02	0.95	No bias	Os.20667.1.S1_at	PPP
Chr5	5964794	5966345	Maternal	Endosperm	LOC_Os05g10800.1		cDNA	expressed protein	5056	2	219	3.78571	0.125	1	5.28838		4	0	0	0	Reads below threshold	Os.52890.1.S1_at	PPP
Chr5	15078830	15090045	Maternal	Endosperm	LOC_Os05g26040.1		cDNA	pumilio-family RNA binding repeat containing protein, expressed	23081	21	2630	46.8571	0.107143	0.993431	50.209		3296	150	0.75	0.75	No bias	OsAffx.4433.1.S1_at	AAA
Chr5	15124047	15133191	Maternal	Endosperm	LOC_Os05g26110.1		cDNA	transposon protein, putative, Mutator sub-class	5852	9	840	15	0	1	23.1094		88	0	0	0	Reads below threshold	OsAffx.27020.1.S1_x_at	PAA
Chr5	20245815	20247715	Maternal	Endosperm	LOC_Os05g34310.1		cDNA	no apical meristem protein, putative, expressed	18137	6	1803	32.1071	0.0892857	0.991833	40.4628		181	31	0.24	0.07	No bias	Os.50016.1.S1_at	APP
Chr5	23853793	23860985	Maternal	Endosperm	LOC_Os05g40790.1	1	cDNA	CCR4-NOT transcription factor, putative, expressed	17216	11	2024	35.9643	0.178571	0.994836	42.8626		437	71	0.45	0.26	No bias	Os.13515.1.S1_at	PPP
Chr5	24075355	24078028	Paternal	Endosperm	LOC_Os05g41220.1	1	cDNA	SNF1-related protein kinase regulatory subunit beta-1, putative, expressed	755	8	179	0.160714	3.03571	0.96875	27.2262		2615	414	2.17	1.97	No bias	Os.15191.1.S1_s_at	PPP
Chr5	27349642	27351763	Maternal	Endosperm	LOC_Os05g47820.1	1	cDNA	expressed protein	2104	6	153	1.19115	0.1695	0.778181	5.31627		27	3	0.03	0	Reads below threshold	Os.16042.1.S2_at	PPA
Chr5	27760699	27765260	Paternal	Endosperm	LOC_Os05g48560.1		cDNA	expressed protein	2543	2	212	0	3.78571	1	47.8802		2	0	0	0	Reads below threshold	OsAffx.15151.1.S1_at	AAA
Chr5	28817869	28818748	Maternal	Endosperm	LOC_Os05g50390.1		cDNA	expressed protein	128	10	25	0.2217	0	1	1.72087		2	1	0.01	0	Reads below threshold	Os.56966.1.S1_at	PAP
Chr6	3249463	3260365	Paternal	Endosperm	LOC_Os06g06870.1		cDNA	zinc finger protein, putative, expressed	727	7	69	0.0714286	1.16071	0.923077	10.5519		7873	717	3.76	3.41	No bias	Os.12448.1.S1_at	PPP
Chr6	4370317	4375215	Paternal	Endosperm	LOC_Os06g08740.2		cDNA	expressed protein	7373	37	1061	2.39286	16.5536	0.989744	167.459		16291	2049	10.81	9.68	No bias	Os.15186.1.S1_at	PPP
Chr6	6207294	6213439	Maternal	Endosperm	LOC_Os06g11730.1		cDNA	RNA recognition motif containing protein, putative, expressed	10287	2	450	7.71429	0.321429	0.983957	7.40359		282	8	0.06	0.02	Reads below threshold	Os.12968.1.S1_at	PPA
Chr6	13689893	13696760	Paternal	Endosperm	LOC_Os06g23460.1		cDNA	KH domain containing protein, putative, expressed	1092	7	87	0.178571	1.375	0.96875	14.0367		8995	768	3.87	3.81	Subspecies bias	OsAffx.27788.1.S1_at	PPP
Chr6	19582323	19584411	Maternal	Endosperm	LOC_Os06g33640.1	1	cDNA	CAPIP1, putative, expressed	8734	9	3256	58.0714	0.0714286	0.997154	77.2283		20	5	0.05	0	Reads below threshold	Os.55529.1.S1_at	AAA
Chr6	19603058	19605119	Maternal	Endosperm	LOC_Os06g33690.1		cDNA	CAPIP1, putative, expressed	2178	7	293	5.21429	0.0178571	1	7.66291		11	1	0.01	0	Reads below threshold	Os.55529.1.S1_at	AAA
Chr6	21005679	21007266	Maternal	Endosperm	LOC_Os06g35970.1	1	cDNA	meiosis 5, putative, expressed	968	4	143	1.2529	0.00895	0.954545	2.59026		1054	170	0.91	0.79	No bias	Os.11445.1.S1_at	AAA
Chr6	24126170	24129371	Paternal	Endosperm	LOC_Os06g40490.1		cDNA	glycosyl hydrolases family 17, putative, expressed	722	4	70	0	1.25	1	15.4928		6358	486	2.56	2.3	No bias	Os.50415.1.S1_at	PPP
Chr6	25785529	25786467	Paternal	Endosperm	LOC_Os06g42910.1		cDNA	expressed protein	1129	28	401	1	6.16071	0.926829	62.5071		44	1	0	0.01	Reads below threshold	Os.55188.1.S1_at	PAA
Chr6	25825906	25827084	Paternal	Endosperm	LOC_Os06g42990.1		cDNA	AP2 domain containing protein	1628	8	182	0.0714286	3.17857	1	27.4908		2	1	0	0.01	Reads below threshold	OsAffx.15900.1.S1_at	AAA
Chr7	4701864	4711518	Maternal	Endosperm	LOC_Os07g09020.1		cDNA	argonaute, putative, expressed	1277	11	110	0.9714	0	1	3.04042		119	10	0.05	0.05	Reads below threshold	Os.53826.1.S1_at	PPP
Chr7	6883498	6888069	Maternal	Endosperm	LOC_Os07g12260.1		cDNA	retrotransposon protein, putative, unclassified	224	12	23	0.20395	0	1	1.59607		2	0	0	0	Reads below threshold	OsAffx.3765.1.S1_at	AAA
Chr7	7119724	7125463	Paternal	Endosperm	LOC_Os07g12490.1	1	cDNA	KH domain containing protein, putative, expressed	2825	5	365	0.0178571	6.5	1	56.6063		4117	359	1.76	1.83	No bias	Os.20010.1.S1_at	PAA
Chr7	10304768	10307378	Paternal	Endosperm	LOC_Os07g17460.1		cDNA	OsFBL36 - F-box domain and LRR containing protein, expressed	758	9	116	0	2.07143	1	22.817		1	0	0	0	Reads below threshold	Os.52900.1.S1_at	PPP
Chr7	15867936	15873107	Paternal	Endosperm	LOC_Os07g27300.1	1	cDNA	RNA-binding protein Luc7-like, putative, expressed	1139	5	75	0.160714	1.17857	0.954545	9.61544		4293	268	1.32	1.36	Subspecies bias	Os.27553.1.S1_a_at	PPP
Chr7	15919712	15924788	Maternal	Endosperm	LOC_Os07g27359.1		cDNA	expressed protein	5477	11	822	14.5893	0.0892857	0.994585	20.9164		45	16	0.06	0.1	Reads below threshold	Os.52926.1.S1_at	AAA
Chr7	16892637	16899212	Maternal	Endosperm	LOC_Os07g28850.1		cDNA	retrotransposon protein, putative, unclassified, expressed	2504	12	248	2.12765	0.06265	0.862745	3.60424		58	6	0.01	0.05	Reads below threshold	Os.7338.1.S1_at	PPP
Chr7	19236803	19237240	Maternal	Endosperm	LOC_Os07g32360.1		cDNA	hypothetical protein	52	3	27	0.23095	0.00895	0.933333	1.72087		2876	0	0	0	Reads below threshold	OsAffx.28709.1.S1_at	APP
Chr7	20751222	20753518	Maternal	Endosperm	LOC_Os07g34620.1		cDNA	expressed protein	16952	3	633	11.125	0.178571	1	19.5831		1777	40	0.23	0.17	No bias	Os.7660.1.S1_at	AAA
Chr7	22542283	22543962	Maternal	Endosperm	LOC_Os07g37620.1		cDNA	fiber expressed protein, putative, expressed	2960	2	64	0.47335	0.09845	0.803922	1.72087		9945	227	1.23	1.04	No bias	Os.32022.1.S1_at	PPP
Chr7	23783963	23790394	Maternal	Endosperm	LOC_Os07g39690.1		cDNA	GCN5-related N-acetyltransferase, putative, expressed	2187	3	50	0.38025	0.06175	0.78022	1.50886		2062	95	0.47	0.48	No bias	Os.7319.1.S1_at	PPA
Chr7	24632590	24635325	Paternal	Endosperm	LOC_Os07g41160.1	1	cDNA	protein of unknown function DUF1675 domain containing protein, expressed	256	9	47	0.125	0.714286	0.823529	5.67748		1266	240	0.98	1.42	No bias	OsAffx.16669.1.S1_at	AAA
Chr7	24960175	24963390	Maternal	Endosperm	LOC_Os07g41650.1	1	cDNA	pectinesterase, putative, expressed	1190	3	67	1.19643	0	1	1.7622		57	4	0.04	0	Reads below threshold	Os.54802.1.S1_at	AAA
Chr8	35030	45123	Paternal	Endosperm	LOC_Os08g01054.1	2	cDNA	retrotransposon protein, putative, unclassified, expressed	3891	11	343	0.0357143	6.08929	0.991379	50.7922		11677	1256	6.4	6.16	No bias	Os.17519.1.S1_at	PPP
Chr8	1627506	1630175	Maternal	Endosperm	LOC_Os08g03470.1		cDNA	MBTB15 - Bric-a-Brac, Tramtrack, Broad Complex BTB domain with Meprin and TRAF Homology MATH domain, expressed	1864	7	148	2.64286	0	1	3.3517		10	2	0.02	0	Reads below threshold	Os.55728.1.S1_at	PPP
Chr8	2094647	2099607	Maternal	Endosperm	LOC_Os08g04290.1		cDNA	WD domain, G-beta repeat domain containing protein, expressed	7399	1	61	0.5302	0.00895	0.928571	1.63186		13	1	0.01	0	Reads below threshold	OsAffx.16823.1.S1_at	AAA
Chr8	5207388	5208572	Maternal	Endosperm	LOC_Os08g08960.1		cDNA	Cupin domain containing protein, expressed	630	1	40	0.3295	0.02685	0.888889	1.84449		403	75	0.75	0	Maternal	Os.1853.1.S1_at	MPA
Chr8	5601625	5606320	Maternal	Endosperm	LOC_Os08g09700.1	1	cDNA	OsFBX270 - F-box domain containing protein, expressed	4124	19	1014	16.3571	1.75	0.992823	15.9341		19	1	0.01	0	Reads below threshold	OsAffx.29122.1.S1_at	APP
Chr8	14749895	14756001	Paternal	Endosperm	LOC_Os08g24420.1		cDNA	SWP, putative, expressed	2482	10	157	0.589286	2.21429	1	18.4267		14326	1160	5.89	5.71	Subspecies bias	Os.8780.1.S1_at	PPP
Chr8	16625237	16630550	Paternal	Endosperm	LOC_Os08g27240.1		cDNA	ARID/BRIGHT DNA-binding domain containing protein	339	17	95	0.0892857	1.60714	0.944444	17.4092		705	261	1.36	1.25	No bias	Os.47452.1.A1_at	PPP
Chr8	16991880	16994168	Maternal	Endosperm	LOC_Os08g27870.1		cDNA	EARLY flowering protein, putative	2270	5	451	8.03571	0.0178571	1	11.9239		2	0	0	0	Reads below threshold	OsAffx.29387.1.S1_at	AAP
Chr8	17718005	17722335	Maternal	Endosperm	LOC_Os08g28960.1	2	cDNA	expressed protein	1492	4	97	0.80565	0.0537	0.833333	2.32996		7	1	0.01	0	Reads below threshold	****no probe set to this locus available ****
Chr8	19380239	19384424	Maternal	Endosperm	LOC_Os08g31340.1		cDNA	heavy metal-associated domain containing protein, expressed	779	3	87	0.7253	0.0443	0.886667	2.52586		941	76	0.47	0.29	No bias	Os.55527.1.S1_at	AAA
Chr8	20386851	20389574	Maternal	Endosperm	LOC_Os08g32880.1		cDNA	disease resistance protein RPM1, putative	295	8	26	0.2127	0.0176	0.928571	1.59607		1803	244	1.25	1.19	No bias	****no probe set to this locus available ****
Chr8	24558179	24563398	Maternal	Endosperm	LOC_Os08g38850.1	1	cDNA	phosphatidylinositol transfer, putative, expressed	15839	1	132	2.35714	0	1	3.23523		16802	363	1.82	1.81	No bias	Os.49109.1.S1_at	AAA
Chr8	26322282	26325910	Paternal	Endosperm	LOC_Os08g41710.1		cDNA	FHA domain containing protein, putative, expressed	3171	6	284	0.0357143	5.03571	1	54.8588		12621	910	5.12	3.98	No bias	Os.6151.1.S1_at	PPP
Chr8	26723184	26726081	Maternal	Endosperm	LOC_Os08g42350.1		cDNA	nodulin MtN3 family protein, putative, expressed	1046	3	91	0.80275	0	1	1.96708		62	2	0.02	0	Reads below threshold	Os.10401.1.S1_s_at	PPA
Chr8	27051487	27056661	Maternal	Endosperm	LOC_Os08g42750.1		cDNA	CAMK_CAMK_like.37 - CAMK includes calcium/calmodulin depedent protein kinases, expressed	8126	7	264	4.33929	0.375	0.875	3.57102		46167	4614	24.13	22.01	No bias	Os.14654.1.S1_at	PPP
Chr8	27499575	27502258	Maternal	Endosperm	LOC_Os08g43480.1	1	cDNA	zinc finger, C3HC4 type family protein, expressed	4603	1	37	0.29285	0.03535	0.832237	1.82504		4821	443	2.46	1.97	No bias	Os.7377.1.S1_at	PPP
Chr8	28170866	28178661	Paternal	Endosperm	LOC_Os08g44860.7	1	cDNA	aminopeptidase, putative, expressed	10979	11	1178	5.08929	15.9464	0.892857	95.1259		33350	3760	20.35	17.25	No bias	Os.12607.1.S1_s_at	PPP
Chr9	1198227	1210378	Maternal	Endosperm	LOC_Os09g02690.1	1	cDNA	expressed protein	1052	5	268	4.75	0.0357143	1	6.39985		39	0	0	0	Reads below threshold	OsAffx.17541.1.S1_at	PPP
Chr9	1463327	1469443	Paternal	Endosperm	LOC_Os09g03090.1		cDNA	expressed protein	6016	1	104	0	1.85714	1	19.0127		6126	216	1.16	1	No bias	Os.8028.1.S1_at	PPP
Chr9	1725956	1727653	Maternal	Endosperm	LOC_Os09g03500.1		cDNA	ZOS9-01 - C2H2 zinc finger protein, expressed	2436	11	581	10.3393	0.0357143	0.99026	11.888		5	1	0.01	0	Reads below threshold	****no probe set to this locus available ****
Chr9	4073208	4076005	Maternal	Endosperm	LOC_Os09g07940.1		cDNA	retrotransposon protein, putative, unclassified	2866	22	494	8.82143	0	1	14.6846		23	7	0.01	0.06	Reads below threshold	****no probe set to this locus available ****
Chr9	5413271	5418455	Maternal	Endosperm	LOC_Os09g09950.1		cDNA	retrotransposon protein, putative, unclassified	3499	5	1252	22.2679	0.0892857	1	32.6043		8	3	0.03	0	Reads below threshold	Os.13861.1.S1_at	AAA
Chr9	6184260	6185368	Paternal	Endosperm	LOC_Os09g11160.1		cDNA	expressed protein	205	11	55	0.20485	0.28505	0.351351	1.36343		609	575	3.27	2.48	Subspecies bias	OsAffx.29800.1.S1_at	AAA
Chr9	12435989	12438169	Paternal	Endosperm	LOC_Os09g20650.1	1	cDNA	OsFBX323 - F-box domain containing protein, expressed	718	2	56	0.0178571	0.982143	1	9.89157		1412	86	0.46	0.4	No bias	Os.10885.1.S1_at	PPP
Chr9	14433370	14439385	Maternal	Endosperm	LOC_Os09g24290.1		cDNA	agenet domain-containing protein, putative	5621	10	954	15.2679	1.76786	0.710963	11.7998		2	0	0	0	Reads below threshold	OsAffx.30543.2.S1_x_at	APA
Chr9	15990280	15995928	Maternal	Endosperm	LOC_Os09g26470.1		cDNA	zinc finger, C3HC4 type family protein, expressed	1830	5	127	1.12105	0	1	3.04042		2	0	0	0	Reads below threshold	OsAffx.17910.1.S1_at	PPP
Chr9	17549265	17552888	Maternal	Endosperm	LOC_Os09g28880.1		cDNA	DUF617 domain containing protein, expressed	29	2	22	0.19515	0	1	1.59607		2	0	0	0	Reads below threshold	Os.50419.1.S2_at	APA
Chr9	17599529	17607512	Paternal	Endosperm	LOC_Os09g28940.1		cDNA	ubiquitin carboxyl-terminal hydrolase domain containing protein, expressed	667	4	22	0	0.392857	1	4.1983		4702	128	0.74	0.54	No bias	OsAffx.30070.1.S1_at	PPP
Chr9	20326086	20330056	Maternal	Endosperm	LOC_Os09g34880.1		cDNA	basic region leucine zipper domain containing protein, expressed	2051	6	269	4.80357	0	1	8.07269		11	0	0	0	Reads below threshold	Os.5537.1.S1_s_at	AAA
Chr9	20469341	20470966	Maternal	Endosperm	LOC_Os09g35600.1		cDNA	MATE domain containing protein, expressed	2018	4	121	1.05835	0.0088	1	2.20972		239	16	0.08	0.08	Reads below threshold	OsAffx.30142.1.S1_x_at	APA
Chr9	21045812	21049549	Maternal	Endosperm	LOC_Os09g36470.1		cDNA	retrotransposon protein, putative, unclassified, expressed	2829	29	699	12.4286	0.0535714	1	21.2501		24	7	0.05	0.02	Reads below threshold	Os.56554.1.S1_at	PPP
Chr9	21751268	21757050	Maternal	Endosperm	LOC_Os09g37760.1		cDNA	bromodomain domain containing protein, expressed	815	10	63	0.47825	0.07995	0.716667	1.46987		4032	1212	6.28	5.84	No bias	Os.26925.1.S1_at	PPP
Chr9	22120102	22120353	Maternal	Endosperm	LOC_Os09g38429.1		cDNA	hypothetical protein	50	6	36	0.312	0.00895	0.961538	1.46987		1643	0	0	0	Reads below threshold	****no probe set to this locus available ****
Chr10	347798	356989	Maternal	Endosperm	LOC_Os10g01540.1	1	cDNA	notchless protein, putative, expressed	1034	3	61	0.46815	0.07055	0.789007	1.38482		964	108	0.62	0.46	No bias	Os.23259.1.S1_a_at	PAP
Chr10	2373592	2377611	Paternal	Endosperm	LOC_Os10g04890.1	1	cDNA	expressed protein	1573	9	254	0.178571	4.35714	1	51.0793		8	1	0	0.01	Reads below threshold	Os.46727.1.S1_at	PAP
Chr10	2421032	2425544	Paternal	Endosperm	LOC_Os10g04980.1		cDNA	OsFBX365 - F-box domain containing protein, expressed	1415	2	39	0	0.696429	1	7.21511		2	0	0	0	Reads below threshold	Os.46853.2.S1_x_at	AAA
Chr10	2730711	2733286	Paternal	Endosperm	LOC_Os10g05520.1		cDNA	OsFBX371 - F-box domain containing protein, expressed	507	5	26	0	0.464286	1	5.41346		10	2	0.02	0	Reads below threshold	Os.46802.1.S1_at	PPP
Chr10	2896593	2898171	Maternal	Endosperm	LOC_Os10g05750.1		cDNA	POEI3 - Pollen Ole e I allergen and extensin family protein precursor, expressed	880	11	162	2.89286	0	1	5.22453		195	28	0.28	0	Reads below threshold	Os.8203.1.S1_at	AAA
Chr10	9940790	9946151	Maternal	Endosperm	LOC_Os10g19960.1		cDNA	beta-galactosidase, putative, expressed	570	11	78	0.6615	0.0264	0.969697	1.59607		15	3	0.03	0	Reads below threshold	OsAffx.20496.1.S1_s_at	PPP
Chr10	16068672	16073477	Maternal	Endosperm	LOC_Os10g30944.1		cDNA	expressed protein	4152	3	421	6.41071	1.10714	0.663551	4.13038		3083	129	0.74	0.55	No bias	Os.46594.1.S1_at	AAA
Chr10	16069547	16078737	Paternal	Endosperm	LOC_Os10g30944.2		cDNA	expressed protein	4152	3	421	6.41071	1.10714	0.663551	4.13038		3083	89	0.42	0.47	No bias	Os.46594.2.S1_at	PAA
Chr10	17980631	17985684	Paternal	Endosperm	LOC_Os10g33940.1		cDNA	auxin response factor 18, putative, expressed	348	11	45	0.107143	0.696429	0.857143	5.24073		7425	1217	6.6	5.57	No bias	Os.3105.1.S1_at	PPP
Chr10	20180648	20182159	Maternal	Endosperm	LOC_Os10g37830.2	1	cDNA	OsFBX391 - F-box domain containing protein, expressed	2209	2	55	0.4535	0.03535	0.87971	2.29344		5854	158	0.75	0.83	No bias	Os.3246.1.S1_at	PPP
Chr10	20955933	20960704	Maternal	Endosperm	LOC_Os10g39420.1		cDNA	CAMK_CAMK_like.8 - CAMK includes calcium/calmodulin depedent protein kinases, expressed	240233	4	4373	77.1786	0.910714	0.980048	90.919		14237	309	1.58	1.51	No bias	Os.8477.1.S1_a_at	PPP
Chr10	21221362	21225978	Paternal	Endosperm	LOC_Os10g39780.1	3	cDNA	protein phosphatase 2C, putative, expressed	1697	7	160	0	2.85714	1	27.1989		9814	1241	6.77	5.64	No bias	Os.3095.1.S1_at	PPP
Chr11	4072807	4079376	Paternal	Endosperm	LOC_Os11g07910.1		cDNA	transmembrane 9 superfamily member, putative, expressed	4027	4	76	0	1.35714	1	12.8452		12365	611	3.3	2.81	No bias	Os.26444.1.S1_at	AAP
Chr11	4989857	5001655	Paternal	Endosperm	LOC_Os11g09329.1		cDNA	VHS and GAT domain containing protein, expressed	1205	19	190	0.571429	2.82143	0.972973	31.5984		7625	1482	7.42	7.4	No bias	Os.7649.1.S1_at	PPP
Chr11	7689886	7692164	Maternal	Endosperm	LOC_Os11g13930.1		cDNA	ZF-HD protein dimerisation region containing protein, expressed	328	10	58	0.48625	0.02655	0.9125	1.87522		5385	1022	5.49	4.73	No bias	OsAffx.18838.1.S1_at	AAA
Chr11	14940752	14945582	Maternal	Endosperm	LOC_Os11g26830.1		cDNA	ATP-binding region, ATPase-like domain containing protein	917	5	73	0.64565	0	1	2.80537		4	0	0	0	Reads below threshold	OsAffx.31145.1.S1_at	PPP
Chr11	15348172	15348908	Maternal	Endosperm	LOC_Os11g27470.1		cDNA	hypothetical protein	673	3	132	2.35714	0	1	3.93018		1	1	0.01	0	Reads below threshold	OsAffx.7220.1.S1_at	AAA
Chr11	21239357	21241906	Maternal	Endosperm	LOC_Os11g36760.1		cDNA	transmembrane receptor, putative	783	19	158	2.67857	0.142857	0.90625	3.53916		2	1	0.01	0	Reads below threshold	OsAffx.7315.1.S1_at	AAA
Chr11	24726853	24731188	Maternal	Endosperm	LOC_Os11g41890.1		cDNA	RNA recognition motif containing protein, putative, expressed	29453	7	755	11.8036	1.67857	0.675214	6.61758		8970	282	1.49	1.33	No bias	Os.9816.1.S2_a_at	PPP
Chr12	1916838	1919667	Maternal	Endosperm	LOC_Os12g04510.1		cDNA	DNA-directed RNA polymerases I, II, and III subunit RPABC1, putative, expressed	1970	2	185	3.23214	0.0714286	0.968421	3.93381		1781	4	0.03	0.01	Reads below threshold	Os.9249.1.S1_at	PPP
Chr12	2192854	2196127	Paternal	Endosperm	LOC_Os12g05040.1	3	cDNA	heavy-metal-associated domain-containing protein, putative, expressed	8511	10	622	0.642857	10.4643	0.966258	133.678		17769	1324	6.53	6.71	Subspecies bias	****no probe set to this locus available ****
Chr12	4514661	4516334	Paternal	Endosperm	LOC_Os12g08780.1		cDNA	flavin monooxygenase, putative, expressed	451	6	75	0	1.33929	1	12.8452		1	0	0	0	Reads below threshold	OsAffx.31651.1.S1_at	AAA
Chr12	16497492	16502180	Maternal	Endosperm	LOC_Os12g27994.1		cDNA	expressed protein	3929	28	965	16.1071	1.125	0.851064	15.8052		7664	1883	10.06	8.77	No bias	Os.21264.1.S1_s_at	PPP
Chr12	18827072	18832082	Paternal	Endosperm	LOC_Os12g31350.1		cDNA	SSXT protein, putative, expressed	2118	9	435	0.0714286	7.69643	0.989286	83.3446		10892	2152	11.03	10.49	No bias	Os.8856.1.S1_at	PPP
Chr12	19363279	19364200	Paternal	Endosperm	LOC_Os12g32150.1		cDNA	expressed protein	1126	13	403	0.232143	6.96429	0.995177	90.5831		3	3	0	0.03	Reads below threshold	****no probe set to this locus available ****
Chr12	19385421	19386206	Paternal	Endosperm	LOC_Os12g32170.1		cDNA	hypothetical protein	564	4	43	0	0.767857	1	9.29867		6	0	0	0	Reads below threshold	****no probe set to this locus available ****
Chr12	22622813	22629039	Paternal	Endosperm	LOC_Os12g36950.1	1	cDNA	CTP synthase, putative, expressed	903	3	71	0.196429	1.07143	1	7.34804		6242	482	2.33	2.49	No bias	Os.27769.1.S1_a_at	PPP
Chr12	23232491	23239382	Paternal	Endosperm	LOC_Os12g37860.1		cDNA	expressed protein	4823	14	568	0.178571	9.96429	0.983146	81.6901		25221	2938	15.33	14.05	No bias	Os.15365.1.S1_at	PPP
Chr12	25036052	25044093	Paternal	Endosperm	LOC_Os12g40520.1		cDNA	MATH domain containing protein, expressed	2866	8	183	0.303571	2.96429	1	25.1549		13756	761	4.09	3.52	No bias	Os.49666.1.S1_at	PPP
(C) Biased non-genic regions in endosperm
Chr	Start	End	Bias Type	Tissue	Neighbouring Transcripts		Feature
Chr1	3823524	3826038	Maternal	Endosperm	LOC_Os01g07920.1 || LOC_Os01g07910.1		Non-genic - Intergenic
Chr1	3830847	3834128	Maternal	Endosperm	LOC_Os01g07930.1 || LOC_Os01g07940.1		Non-genic - Intergenic
Chr1	4139634	4142350	Maternal	Endosperm	LOC_Os01g08420.1 || LOC_Os01g08430.1		Non-genic - Intergenic
Chr1	13784155	13787440	Maternal	Endosperm	LOC_Os01g24450.1 || LOC_Os01g24460.1		Non-genic - Intergenic
Chr1	14005999	14011488	Maternal	Endosperm	LOC_Os01g24870.1 || LOC_Os01g24880.1		Non-genic - Intergenic
Chr1	17589149	17597882	Maternal	Endosperm	LOC_Os01g32140.1 || LOC_Os01g32150.1		Non-genic - Intergenic
Chr1	23962412	23968712	Maternal	Endosperm	LOC_Os01g42280.1		Non-genic - Intergenic
Chr1	27582086	27586332	Maternal	Endosperm	LOC_Os01g48170.1 || LOC_Os01g48180.1		Non-genic - Intergenic
Chr1	40172248	40174605	Maternal	Endosperm	LOC_Os01g69110.1 || LOC_Os01g69120.1		Non-genic - Intergenic
Chr1	40539921	40553708	Maternal	Endosperm	LOC_Os01g70060.1-1		Non-genic - Intron
Chr2	459989	460865	Maternal	Endosperm	LOC_Os02g01830.1 || LOC_Os02g01840.1		Non-genic - Intergenic
Chr2	3922881	3926842	Maternal	Endosperm	LOC_Os02g07570.1 || LOC_Os02g07575.1		Non-genic - Intergenic
Chr2	5569802	5573181	Maternal	Endosperm	LOC_Os02g10590.1 || LOC_Os02g10600.1		Non-genic - Intergenic
Chr2	14968731	14973228	Maternal	Endosperm	LOC_Os02g25620.1 || LOC_Os02g25624.1		Non-genic - Intergenic
Chr2	14980100	14985777	Maternal	Endosperm	LOC_Os02g25630.1 || LOC_Os02g25640.1		Non-genic - Intergenic
Chr2	16953627	16955752	Maternal	Endosperm	LOC_Os02g28660.1-2		Non-genic - Intron
Chr2	17336218	17346217	Maternal	Endosperm	LOC_Os02g29220.1 || LOC_Os02g29230.1		Non-genic - Intergenic
Chr2	17357070	17367069	Maternal	Endosperm	LOC_Os02g29230.1		Non-genic - Intergenic
Chr2	18623267	18633266	Maternal	Endosperm	LOC_Os02g31140.1		Non-genic - Intergenic
Chr2	20975745	20983804	Maternal	Endosperm	LOC_Os02g34990.1 || LOC_Os02g34980.1		Non-genic - Intergenic
Chr2	22134733	22136127	Paternal	Endosperm	LOC_Os02g36680.1-1		Non-genic - Intron
Chr2	24402635	24404296	Paternal	Endosperm	LOC_Os02g40330.3		Non-genic - Intergenic
Chr2	24947528	24950678	Paternal	Endosperm	LOC_Os02g41610.1-1		Non-genic - Intron
Chr2	26220377	26227038	Maternal	Endosperm	LOC_Os02g43450.1 || LOC_Os02g43460.1		Non-genic - Intergenic
Chr2	26232422	26234256	Maternal	Endosperm	LOC_Os02g43470.1 || LOC_Os02g43460.1		Non-genic - Intergenic
Chr2	33408411	33418410	Maternal	Endosperm	LOC_Os02g54550.1 || LOC_Os02g54560.1		Non-genic - Intergenic
Chr3	6506076	6511743	Maternal	Endosperm	LOC_Os03g12350.1 || LOC_Os03g12340.1		Non-genic - Intergenic
Chr3	20694616	20697119	Maternal	Endosperm	LOC_Os03g37340.1 || LOC_Os03g37350.1		Non-genic - Intergenic
Chr3	32950768	32957496	Maternal	Endosperm	LOC_Os03g57854.1-1		Non-genic - Intron
Chr3	33210289	33219329	Maternal	Endosperm	LOC_Os03g58300.1 || LOC_Os03g58320.1		Non-genic - Intergenic
Chr4	4280867	4290866	Maternal	Endosperm	LOC_Os04g08034.6		Non-genic - Intergenic
Chr4	4646109	4646907	Maternal	Endosperm	LOC_Os04g08570.1 || LOC_Os04g08560.1		Non-genic - Intergenic
Chr4	9664822	9674821	Maternal	Endosperm	LOC_Os04g17660.2 || LOC_Os04g17669.1		Non-genic - Intergenic
Chr4	11641100	11650855	Maternal	Endosperm	LOC_Os04g20774.1-2		Non-genic - Intron
Chr4	22698870	22701531	Maternal	Endosperm	LOC_Os04g38510.1 || LOC_Os04g38525.1		Non-genic - Intergenic
Chr4	24808692	24814395	Paternal	Endosperm	LOC_Os04g42250.3-2		Non-genic - Intron
Chr5	15078830	15090045	Maternal	Endosperm	LOC_Os05g26040.1-1		Non-genic - Intron
Chr5	15124047	15133191	Maternal	Endosperm	LOC_Os05g26110.1-1		Non-genic - Intron
Chr5	16162623	16170220	Maternal	Endosperm	LOC_Os05g27820.1 || LOC_Os05g27830.1		Non-genic - Intergenic
Chr5	27606800	27611291	Maternal	Endosperm	LOC_Os05g48270.1 || LOC_Os05g48280.1		Non-genic - Intergenic
Chr5	27611292	27619831	Maternal	Endosperm	LOC_Os05g48280.1-1		Non-genic - Intron
Chr6	12652029	12654817	Maternal	Endosperm	LOC_Os06g21890.1 || LOC_Os06g21900.1		Non-genic - Intergenic
Chr6	12658096	12664586	Maternal	Endosperm	LOC_Os06g21910.1		Non-genic - Intergenic
Chr6	16786116	16790221	Maternal	Endosperm	LOC_Os06g29360.1 || LOC_Os06g29370.1		Non-genic - Intergenic
Chr6	19578162	19582322	Maternal	Endosperm	LOC_Os06g33640.1 || LOC_Os06g33630.1		Non-genic - Intergenic
Chr6	19581001	19584411	Maternal	Endosperm	LOC_Os06g33640.2-1		Non-genic - Intron
Chr7	8178901	8188900	Maternal	Endosperm	LOC_Os07g14330.1 || LOC_Os07g14340.1		Non-genic - Intergenic
Chr7	15712343	15717343	Paternal	Endosperm	LOC_Os07g27110.1 || LOC_Os07g27100.1		Non-genic - Intergenic
Chr7	15916907	15919711	Maternal	Endosperm	LOC_Os07g27350.1 || LOC_Os07g27359.1		Non-genic - Intergenic
Chr7	18766148	18771516	Maternal	Endosperm	LOC_Os07g31620.1 || LOC_Os07g31610.1		Non-genic - Intergenic
Chr7	19240549	19242271	Maternal	Endosperm	LOC_Os07g32370.1 || LOC_Os07g32380.1		Non-genic - Intergenic
Chr7	25363567	25368467	Maternal	Endosperm	LOC_Os07g42390.1 || LOC_Os07g42395.2		Non-genic - Intergenic
Chr7	25362525	25364559	Maternal	Endosperm	LOC_Os07g42390.2-1		Non-genic - Intron
Chr7	25362579	25364544	Maternal	Endosperm	LOC_Os07g42390.3-1		Non-genic - Intron
Chr7	28778893	28782945	Paternal	Endosperm	LOC_Os07g48180.1-1		Non-genic - Intron
Chr7	28920073	28921280	Maternal	Endosperm	LOC_Os07g48400.1 || LOC_Os07g48390.1		Non-genic - Intergenic
Chr8	32519	40838	Paternal	Endosperm	LOC_Os08g01054.3		Non-genic - Intergenic
Chr8	4303700	4310786	Maternal	Endosperm	LOC_Os08g07700.1 || LOC_Os08g07710.1		Non-genic - Intergenic
Chr8	4371934	4377187	Maternal	Endosperm	LOC_Os08g07820.1 || LOC_Os08g07810.1		Non-genic - Intergenic
Chr8	8907805	8917617	Maternal	Endosperm	LOC_Os08g14820.1 || LOC_Os08g14810.1		Non-genic - Intergenic
Chr8	16991880	16994168	Maternal	Endosperm	LOC_Os08g27870.1-1		Non-genic - Intron
Chr8	19134919	19136895	Maternal	Endosperm	LOC_Os08g31000.1 || LOC_Os08g30990.1		Non-genic - Intergenic
Chr8	19278571	19288570	Maternal	Endosperm	LOC_Os08g31190.1 || LOC_Os08g31200.1		Non-genic - Intergenic
Chr9	1198227	1210378	Maternal	Endosperm	LOC_Os09g02690.1-1		Non-genic - Intron
Chr9	1210078	1211855	Maternal	Endosperm	LOC_Os09g02690.2		Non-genic - Intergenic
Chr9	1198205	1210077	Maternal	Endosperm	LOC_Os09g02690.2-1		Non-genic - Intron
Chr9	4067525	4073207	Maternal	Endosperm	LOC_Os09g07930.1		Non-genic - Intergenic
Chr9	5413271	5418455	Maternal	Endosperm	LOC_Os09g09950.1-2		Non-genic - Intron
Chr9	5625306	5635305	Maternal	Endosperm	LOC_Os09g10330.1		Non-genic - Intergenic
Chr9	10811498	10820769	Maternal	Endosperm	LOC_Os09g17680.1 || LOC_Os09g17690.1		Non-genic - Intergenic
Chr9	13533259	13536730	Maternal	Endosperm	LOC_Os09g22410.3 || LOC_Os09g22420.1		Non-genic - Intergenic
Chr9	14439386	14440359	Maternal	Endosperm	LOC_Os09g24300.1 || LOC_Os09g24290.1		Non-genic - Intergenic
Chr9	15995929	16001195	Maternal	Endosperm	LOC_Os09g26470.1 || LOC_Os09g26480.1		Non-genic - Intergenic
Chr9	21620337	21630336	Maternal	Endosperm	LOC_Os09g37520.1		Non-genic - Intergenic
Chr10	1757047	1765322	Maternal	Endosperm	LOC_Os10g03870.1 || LOC_Os10g03880.1		Non-genic - Intergenic
Chr10	15279764	15285601	Maternal	Endosperm	LOC_Os10g29540.1 || LOC_Os10g29549.1		Non-genic - Intergenic
Chr10	15286510	15289331	Maternal	Endosperm	LOC_Os10g29560.1		Non-genic - Intergenic
Chr10	16073478	16080171	Paternal	Endosperm	LOC_Os10g30944.1		Non-genic - Intergenic
Chr10	16069547	16078737	Maternal	Endosperm	LOC_Os10g30944.2-1		Non-genic - Intron
Chr10	20950604	20955932	Maternal	Endosperm	LOC_Os10g39414.1 || LOC_Os10g39420.1		Non-genic - Intergenic
Chr10	20955933	20960704	Maternal	Endosperm	LOC_Os10g39420.1-4		Non-genic - Intron
Chr10	21212075	21222074	Paternal	Endosperm	LOC_Os10g39780.2		Non-genic - Intergenic
Chr10	21224729	21227118	Paternal	Endosperm	LOC_Os10g39780.4		Non-genic - Intergenic
Chr11	4988739	4989856	Paternal	Endosperm	LOC_Os11g09329.2		Non-genic - Intergenic
Chr11	7483003	7489665	Maternal	Endosperm	LOC_Os11g13660.1 || LOC_Os11g13670.1		Non-genic - Intergenic
Chr11	10064322	10070432	Maternal	Endosperm	LOC_Os11g17930.1 || LOC_Os11g17940.1		Non-genic - Intergenic
Chr11	14884388	14894387	Maternal	Endosperm	LOC_Os11g26795.1		Non-genic - Intergenic
Chr11	14945583	14954942	Maternal	Endosperm	LOC_Os11g26830.1 || LOC_Os11g26840.1		Non-genic - Intergenic
Chr11	15340246	15345264	Maternal	Endosperm	LOC_Os11g27460.1 || LOC_Os11g27450.1		Non-genic - Intergenic
Chr11	21048203	21059074	Paternal	Endosperm	LOC_Os11g36470.1 || LOC_Os11g36480.1		Non-genic - Intergenic
Chr11	21225092	21235091	Maternal	Endosperm	LOC_Os11g36740.1		Non-genic - Intergenic
Chr11	21229357	21239356	Maternal	Endosperm	LOC_Os11g36760.1		Non-genic - Intergenic
Chr11	21241907	21245305	Maternal	Endosperm	LOC_Os11g36760.1 || LOC_Os11g36770.1		Non-genic - Intergenic
Chr12	4670281	4680280	Maternal	Endosperm	LOC_Os12g08950.1 || LOC_Os12g08960.1		Non-genic - Intergenic
Chr12	15250417	15264136	Paternal	Endosperm	LOC_Os12g26180.1 || LOC_Os12g26190.1		Non-genic - Intergenic
Chr12	16497492	16505181	Maternal	Endosperm	LOC_Os12g27994.2-1		Non-genic - Intron
Chr12	23669895	23679360	Maternal	Endosperm	LOC_Os12g38590.1-2		Non-genic - Intron
(D) Genes showing parent of origin-specific alternative splicing
Gene	SNPs - Maternal	SNPs - Paternal	SNPs - No Bias	Bias type	SNP coordinate	SNP location
LOC_Os01g36670	2	5	2
				Paternal	20350483	v1-3pUTR
				Paternal	20350553	v1-3pUTR
				Paternal	20350558	v1-3pUTR
				Paternal	20350615	v1-3pUTR
				Paternal	20350970	v1-3pUTR
				Maternal	20357157	v1-Intron
				Maternal	20357920	v1-Intron
				No bias	20359525	v1-Coding
				No bias	20360360	v1-Coding
LOC_Os01g70060	12	11	11
				Paternal	40540020	v2-3pUTR|v1-3pUTR
				Paternal	40540226	v2-3pUTR|v1-3pUTR
				Paternal	40540312	v2-3pUTR|v1-3pUTR
				Paternal	40540382	v2-3pUTR|v1-3pUTR
				Paternal	40540401	v2-3pUTR|v1-3pUTR
				Paternal	40540508	v2-Coding|v1-Coding
				Paternal	40540540	v2-Coding|v1-Coding
				Paternal	40540639	v2-Coding|v1-Coding
				Paternal	40540645	v2-Coding|v1-Coding
				Paternal	40541063	v2-Coding|v1-Coding
				Paternal	40541596	v2-Coding|v1-Coding
				Maternal	40549214	v2-Intron|v1-Intron
				Maternal	40549345	v2-Intron|v1-Intron
				Maternal	40549394	v2-Intron|v1-Intron
				Maternal	40549629	v2-Intron|v1-Intron
				Maternal	40549639	v2-Intron|v1-Intron
				Maternal	40549754	v2-Intron|v1-Intron
				Maternal	40549760	v2-Intron|v1-Intron
				Maternal	40549798	v2-Intron|v1-Intron
				Maternal	40549847	v2-Intron|v1-Intron
				Maternal	40550184	v2-Intron|v1-Intron
				Maternal	40550424	v2-Intron|v1-Intron
				Maternal	40550955	v2-Intron|v1-Intron
				No bias	40551123	v2-Intron|v1-Intron
				No bias	40551213	v2-Intron|v1-Intron
				No bias	40551274	v2-Intron|v1-Intron
				No bias	40551354	v2-Intron|v1-Intron
				No bias	40551390	v2-Intron|v1-Intron
				No bias	40551549	v2-Intron|v1-Intron
				No bias	40551574	v2-Intron|v1-Intron
				No bias	40551651	v2-Intron|v1-Intron
				No bias	40551727	v2-Coding|v1-Coding
				No bias	40551778	v2-Coding|v1-Coding
				No bias	40551931	v2-Intron|v1-Intron
LOC_Os04g20774	30	8	0
				Maternal	11642367	v1-Intron
				Maternal	11642474	v1-Intron
				Maternal	11642525	v1-Intron
				Maternal	11642616	v1-Intron
				Maternal	11642667	v1-Intron
				Maternal	11642702	v1-Intron
				Maternal	11642798	v1-Intron
				Maternal	11642898	v1-Intron
				Maternal	11642998	v1-Intron
				Maternal	11643126	v1-Intron
				Maternal	11643155	v1-Intron
				Maternal	11643167	v1-Intron
				Maternal	11643276	v1-Intron
				Maternal	11643307	v1-Intron
				Maternal	11643360	v1-Intron
				Maternal	11643889	v1-Intron
				Maternal	11644024	v1-Intron
				Maternal	11644067	v1-Intron
				Maternal	11644131	v1-Intron
				Maternal	11644134	v1-Intron
				Maternal	11644191	v1-Intron
				Maternal	11644219	v1-Intron
				Maternal	11644277	v1-Intron
				Maternal	11644338	v1-Intron
				Maternal	11644779	v1-Intron
				Maternal	11644972	v1-Intron
				Maternal	11646195	v1-Intron
				Maternal	11646255	v1-Intron
				Maternal	11646384	v1-Intron
				Maternal	11646573	v1-Intron
				Paternal	11648839	v1-Coding
				Paternal	11649026	v1-Coding
				Paternal	11649140	v1-Coding
				Paternal	11649892	v1-Coding
				Paternal	11650052	v1-3pUTR
				Paternal	11650104	v1-3pUTR
				Paternal	11650147	v1-3pUTR
				Paternal	11650722	v1-3pUTR
LOC_Os04g38525	7	3	8
				Maternal	22701437	v1-Upstream
				Maternal	22701520	v1-Upstream
				Maternal	22701553	v1-Coding
				Maternal	22701720	v1-Intron
				Maternal	22701806	v1-Intron
				Maternal	22701849	v1-Intron
				Maternal	22701911	v1-Intron
				No bias	22702107	v1-Intron
				No bias	22702167	v1-Intron
				No bias	22702234	v1-Intron
				No bias	22702459	v1-Intron
				No bias	22702543	v1-Intron
				No bias	22702716	v1-Intron
				No bias	22702770	v1-Intron
				No bias	22702841	v1-Intron
				Paternal	22706783	v1-Coding
				Paternal	22706804	v1-Coding
				Paternal	22706918	v1-Coding
LOC_Os05g48280	10	3	9
				Maternal	27610557	v1-Upstream
				Maternal	27610860	v1-Upstream
				Maternal	27610947	v1-Upstream
				Maternal	27610953	v1-Upstream
				Maternal	27611012	v1-Upstream
				Maternal	27611052	v1-Upstream
				Maternal	27611426	v1-Intron
				Maternal	27611637	v1-Intron
				Maternal	27611723	v1-Intron
				Maternal	27611854	v1-Intron
				Paternal	27612106	v1-Intron
				Paternal	27612394	v1-Intron
				Paternal	27612888	v1-Intron
				No bias	27616124	v1-Intron
				No bias	27616141	v1-Intron
				No bias	27616339	v1-Intron
				No bias	27616358	v1-Intron
				No bias	27616413	v1-Intron
				No bias	27617084	v1-Intron
				No bias	27617455	v1-Intron
				No bias	27617506	v1-Intron
				No bias	27617570	v1-Intron
LOC_Os07g42390	6	11	4
				No bias	25362881	v1-Coding|v2-Coding|v3-Intron
				Paternal	25363401	v2-Intron|v3-Intron|v1-Coding
				Paternal	25363637	v2-Intron|v3-Intron|v1-Upstream
				Paternal	25363736	v2-Intron|v3-Intron|v1-Upstream
				Paternal	25363755	v2-Intron|v3-Intron|v1-Upstream
				Paternal	25363804	v2-Intron|v3-Intron|v1-Upstream
				Paternal	25363819	v2-Intron|v3-Intron|v1-Upstream
				Paternal	25363841	v2-Intron|v3-Intron|v1-Upstream
				Paternal	25363861	v2-Intron|v3-Intron|v1-Upstream
				Paternal	25363877	v2-Intron|v3-Intron|v1-Upstream
				Paternal	25363909	v2-Intron|v3-Intron|v1-Upstream
				Paternal	25363925	v2-Intron|v3-Intron|v1-Upstream
				Maternal	25364401	v2-Intron|v3-Intron|v1-Upstream
				Maternal	25364560	v1-Upstream|v3-Upstream|v2-Upstream
				Maternal	25364582	v1-Upstream|v3-Upstream|v2-Upstream
				Maternal	25364742	v1-Upstream|v3-Upstream|v2-Upstream
				Maternal	25364808	v1-Upstream|v3-Upstream|v2-Upstream
				Maternal	25364929	v1-Upstream|v3-Upstream|v2-Upstream
				No bias	25368229	v1-Upstream|v3-Upstream|v2-Upstream
				No bias	25368382	v1-Upstream|v3-Upstream|v2-Upstream
				No bias	25368386	v1-Upstream|v3-Upstream|v2-Upstream
LOC_Os08g29124	21	11	10
				Paternal	17820045	v1-3pUTR
				Paternal	17820060	v1-3pUTR
				Paternal	17820128	v1-3pUTR
				Paternal	17820147	v1-3pUTR
				Paternal	17820179	v1-3pUTR
				Paternal	17820257	v1-3pUTR
				Paternal	17820343	v1-3pUTR
				Paternal	17820375	v1-3pUTR
				Paternal	17820429	v1-3pUTR
				Paternal	17820652	v1-3pUTR
				Paternal	17820738	v1-3pUTR
				No bias	17825034	v1-Intron
				No bias	17825133	v1-Intron
				No bias	17825485	v1-Coding
				No bias	17825523	v1-Coding
				No bias	17825549	v1-Coding
				No bias	17825631	v1-Coding
				No bias	17825903	v1-Coding
				No bias	17825904	v1-Coding
				Maternal	17826004	v1-Coding
				Maternal	17826078	v1-Coding
				Maternal	17826094	v1-Coding
				Maternal	17826189	v1-Coding
				Maternal	17826224	v1-Coding
				Maternal	17826526	v1-Coding
				Maternal	17826544	v1-Coding
				Maternal	17826598	v1-Coding
				Maternal	17826628	v1-Coding
				Maternal	17826661	v1-Coding
				Maternal	17826761	v1-Coding
				Maternal	17826778	v1-Coding
				Maternal	17826865	v1-Coding
				Maternal	17826867	v1-Coding
				Maternal	17826988	v1-Coding
				Maternal	17834062	v1-Coding
				Maternal	17834165	v1-Coding
				Maternal	17834221	v1-Intron
				Maternal	17834245	v1-Intron
				Maternal	17834484	v1-Coding
				Maternal	17834958	v1-Intron
				No bias	17835250	v1-Coding
				No bias	17835374	v1-5pUTR
LOC_Os10g29560	9	4	1
				Paternal	15289018	v1-Upstream
				Paternal	15289141	v1-Upstream
				Paternal	15289398	v1-5pUTR
				Paternal	15289705	v1-5pUTR
				Maternal	15291500	v1-Coding
				Maternal	15291536	v1-Coding
				Maternal	15291704	v1-Intron
				Maternal	15291922	v1-Intron
				Maternal	15294723	v1-Coding
				Maternal	15295118	v1-Intron
				Maternal	15295734	v1-Intron
				Maternal	15295806	v1-Coding
				Maternal	15295844	v1-Coding
				No bias	15296956	v1-Coding
LOC_Os11g36470	3	18	3
				Paternal	21035133	v1-Intron
				Paternal	21035250	v1-Intron
				Paternal	21035297	v1-Intron
				Paternal	21035433	v1-Intron
				Paternal	21035496	v1-Intron
				Paternal	21035825	v1-Intron
				Paternal	21035836	v1-Intron
				Paternal	21035908	v1-Coding
				Paternal	21035943	v1-Coding
				Maternal	21040130	v1-Intron
				Maternal	21040173	v1-Intron
				Maternal	21040759	v1-Intron
				Paternal	21041092	v1-Coding
				Paternal	21041553	v1-Coding
				Paternal	21047068	v1-Coding
				Paternal	21050143	v1-Upstream
				Paternal	21050182	v1-Upstream
				Paternal	21050220	v1-Upstream
				Paternal	21050252	v1-Upstream
				Paternal	21050288	v1-Upstream
				Paternal	21050292	v1-Upstream
				No bias	21057758	v1-Upstream
				No bias	21057905	v1-Upstream
				No bias	21057940	v1-Upstream
